# Supplementary material for: Tumor pHe-triggered charge-reversal and redox-responsive nanoparticles for docetaxel delivery in hepatocellular carcinoma treatment
Source: Royal Society of Chemistry journal article supplement (doi:10.1039/c5nr04612b), 2015-01-01
Supplement: c5nr04612b1.pdf [file c5nr04612b1.pdf]

### Appendix: Supplementary material

## **Tumor pH-triggered charge-reversal and redox-responsive nanoparticles for docetaxel delivery in hepatocellular carcinoma treatment**

Fengqian Chen<sup>†</sup>, Jinming Zhang<sup>†</sup>, Lu Wang, Yitao Wang\*, Meiwang Chen\*

*State Key Laboratory of Quality Research in Chinese Medicine, Institute of Chinese Medical Sciences, University of Macau, Macao 999078, China*

<sup>†</sup> These authors contributed equally to the work

**Tab. S1. Synthesis and characteristics of TPSS copolymers with various constituents**

| TPSS polymers | Molar ratio (TPGS-BAP:<br>BAC:HD:piperazine) | Particle size (nm) |           |             | Zeta potential (mV) |           |           |
|---------------|----------------------------------------------|--------------------|-----------|-------------|---------------------|-----------|-----------|
|               |                                              | pH 7.4             | pH 6.5    | 10mM<br>GSH | pH 7.4              | pH 6.5    | 10mM GSH  |
| Polymer 1     | 1:12:8:12                                    | 115.3±2.6          | 118.4±2.5 | 256.1±3.6   | -25.6±5.2           | -17.4±3.6 | -28.4±3.7 |
| Polymer 2     | 1:12:12:25                                   | 97.3±5.1           | 125.6±4.7 | 249.5±5.8   | -31.5±6.3           | +18.4±3.7 | -25.6±6.8 |
| Polymer 3     | 1:8:16:25                                    | 163.4±4.3          | 225.3±6.4 | 178.1±3.5   | -28.4±3.7           | +21.6±4.1 | -24.7±4.6 |

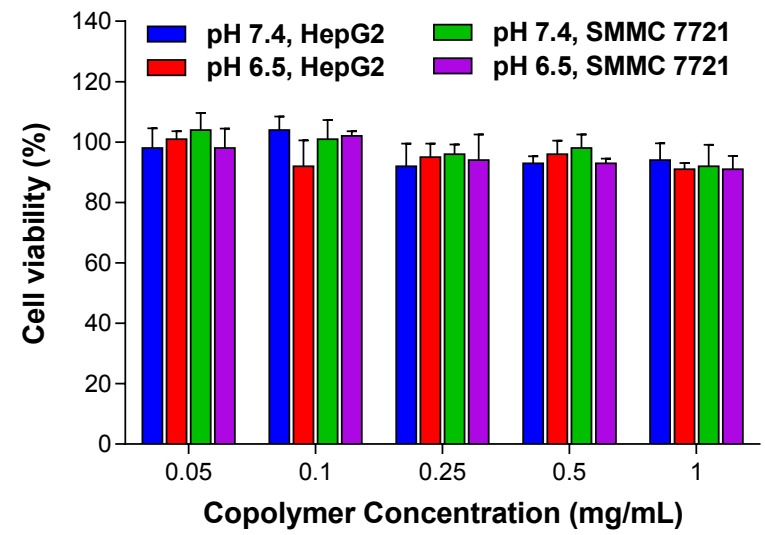

**Fig.S1 Cytotoxicity of blank TPSS NPs against HepG2 and SMMC 7721 cells for 48h incubation**
